# Supplementary material for: Phosphorylation of the Conserved Transcription Factor ATF-7 by PMK-1 p38 MAPK Regulates Innate Immunity in <em>Caenorhabditis elegans</em>
Source: PLOS journal article supplement (doi:10.1371/journal.pgen.1000892), 2010-04-01

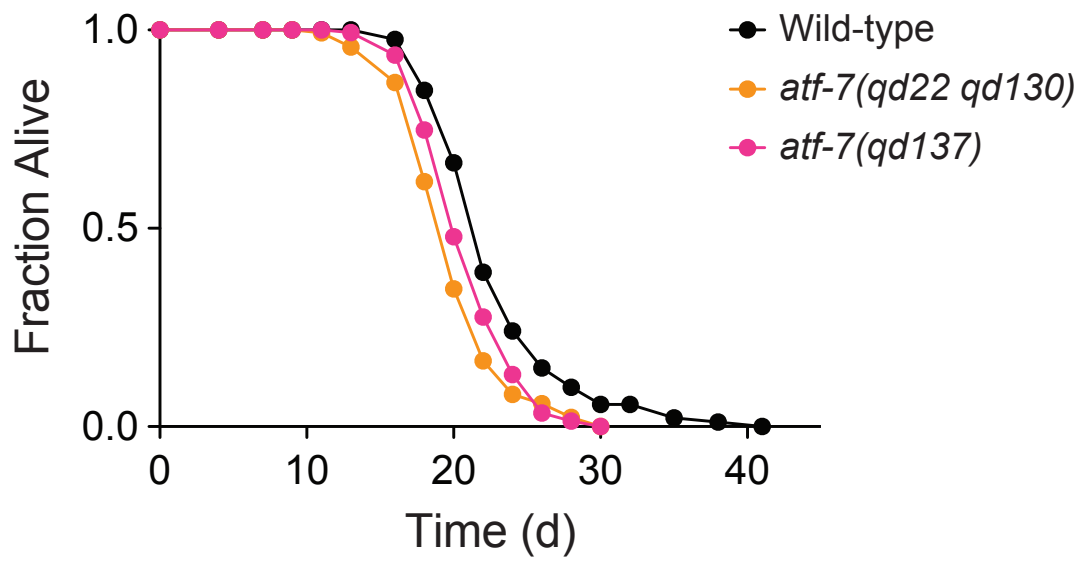

Supplement: S6 (10.1371/journal.pgen.1000892.s006) [file journal.pgen.1000892.s006]
