# Supplementary material for: Phosphorylation of the Conserved Transcription Factor ATF-7 by PMK-1 p38 MAPK Regulates Innate Immunity in <em>Caenorhabditis elegans</em>
Source: PLOS journal article supplement (doi:10.1371/journal.pgen.1000892), 2010-04-01

### Experiment #1

| Genotype                              | Mean LT <sub>50</sub> (h) | LT <sub>50</sub> S.D. (h) | Sample Size (n) |
|---------------------------------------|---------------------------|---------------------------|-----------------|
| Wild-type                             | 104.7                     | 4.2                       | 95              |
| <i>atf-7(qd22 qd130)</i>              | 66.0                      | 9.0                       | 111             |
| <i>atf-7(qd137)</i>                   | 60.3                      | 4.3                       | 113             |
| <i>atf-7(qd22 qd130)/atf-7(+)</i>     | 114.9                     | 8.0                       | 116             |
| <i>atf-7(qd137)/atf-7(+)</i>          | 122.8                     | 12.8                      | 103             |
| <i>atf-7(qd22 qd130)/atf-7(qd137)</i> | 62.9                      | 2.2                       | 119             |

### Experiment #2

| Genotype                              | Mean LT <sub>50</sub> (h) | LT <sub>50</sub> S.D. (h) | Sample Size (n) |
|---------------------------------------|---------------------------|---------------------------|-----------------|
| Wild-type                             | 104.5                     | 4.2                       | 116             |
| <i>atf-7(qd22 qd130)</i>              | 61.4                      | 1.3                       | 126             |
| <i>atf-7(qd137)</i>                   | 59.8                      | 1.6                       | 119             |
| <i>atf-7(qd22 qd130)/atf-7(+)</i>     | 126.6                     | 12.1                      | 118             |
| <i>atf-7(qd137)/atf-7(+)</i>          | 105.8                     | 3.9                       | 129             |
| <i>atf-7(qd22 qd130)/atf-7(qd137)</i> | 60.3                      | 1.5                       | 134             |

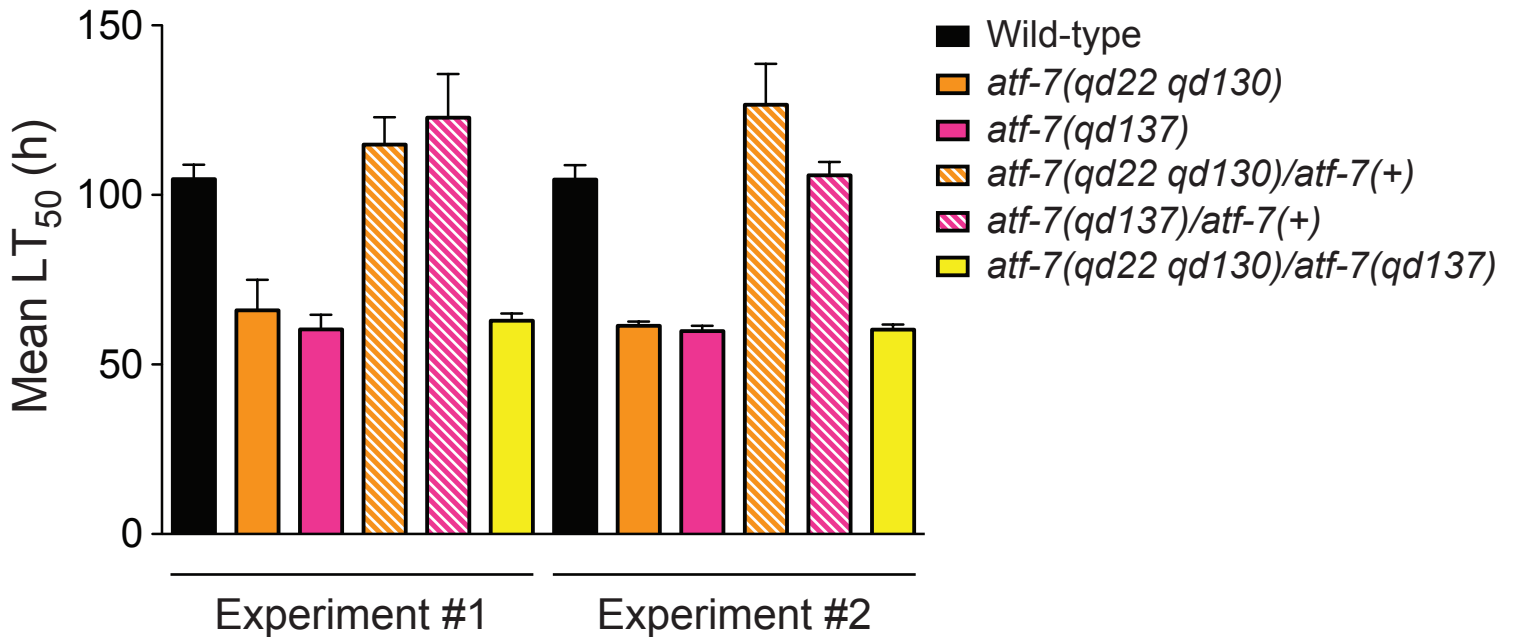

Supplement: S13 (10.1371/journal.pgen.1000892.s013) [file journal.pgen.1000892.s013]
